# Supplementary material for: A TaqMan real-time PCR method based on alternative oxidase genes for detection of plant species in animal feed samples
Source: PubMed Central journal article supplement (PMC5749836; doi:10.1371/journal.pone.0190668), 2018-01-02
Supplement: pone.0190668.s001.pdf [file pone.0190668.s001.pdf]

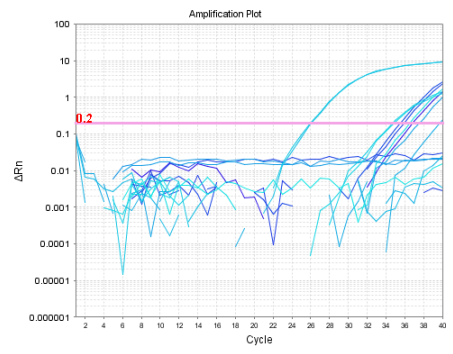

Legend: A B C D E F G H

Options: Target: maize Threshold:  Auto 0.2  Auto Baseline

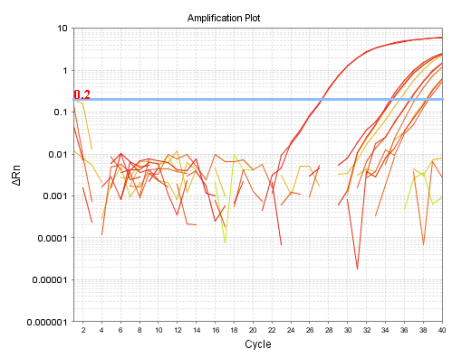

Legend: A B C D E F G H

Options: Target: barley Threshold:  Auto 0.2  Auto Baseline

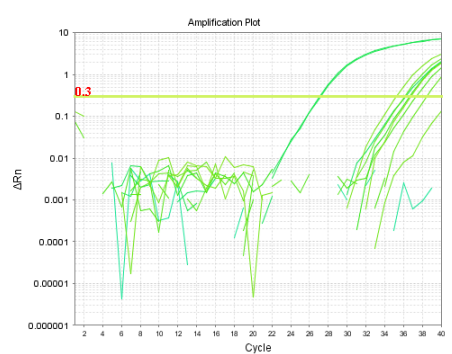

Legend: A B C D E F G H

Options: Target: soybean Threshold:  Auto 0.3  Auto Baseline

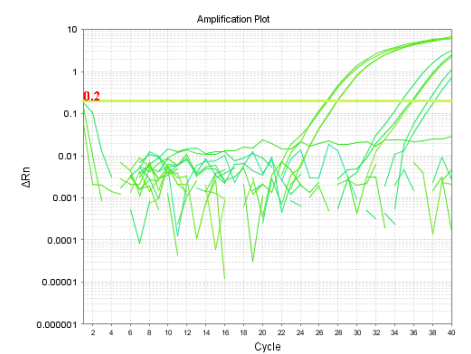

Legend: A B C D E F G H

Options: Target: wheat Threshold:  Auto 0.2  Auto Baseline

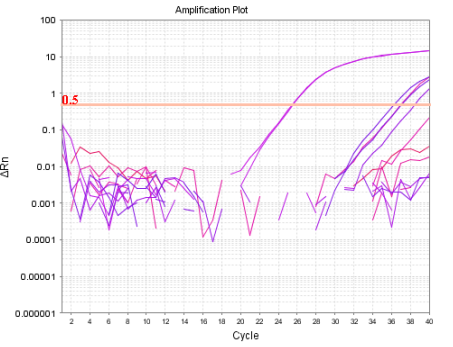

Legend: A B C D E F G H

Options: Target: flax Threshold:  Auto 0.5  Auto Baseline

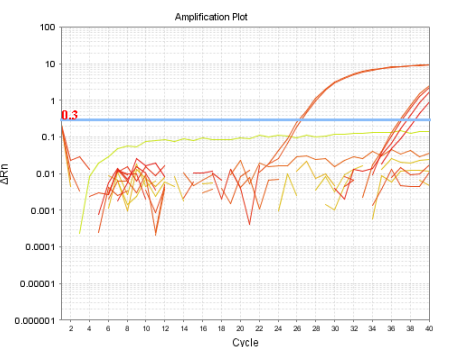

Legend: A B C D E F G H

Options: Target: sunflower Threshold:  Auto 0.3  Auto Baseline

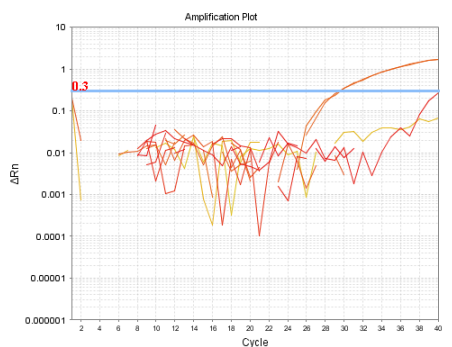

Legend: A B C D E F G H

Options: Target: peanut Threshold:  Auto 0.3  Auto Baseline

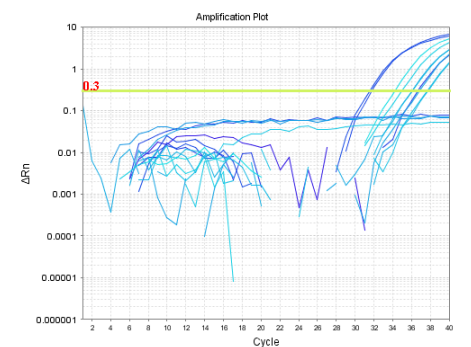

Legend: A B C D E F G H

Options: Target: rice Threshold:  Auto 0.3  Auto Baseline

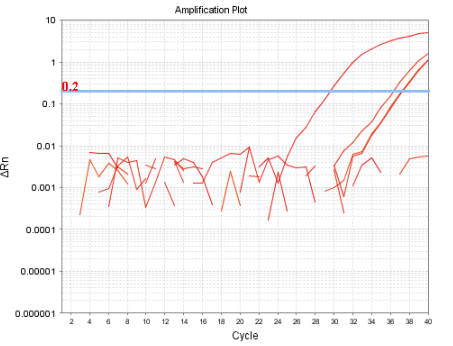

Legend: A B C D E F G H

Options: Target: cotton Threshold:  Auto 0.2  Auto Baseline

S1 Fig
