# Supplementary material for: A TaqMan real-time PCR method based on alternative oxidase genes for detection of plant species in animal feed samples
Source: PubMed Central journal article supplement (PMC5749836; doi:10.1371/journal.pone.0190668), 2018-01-02
Supplement: pone.0190668.s003.pdf [file pone.0190668.s003.pdf]

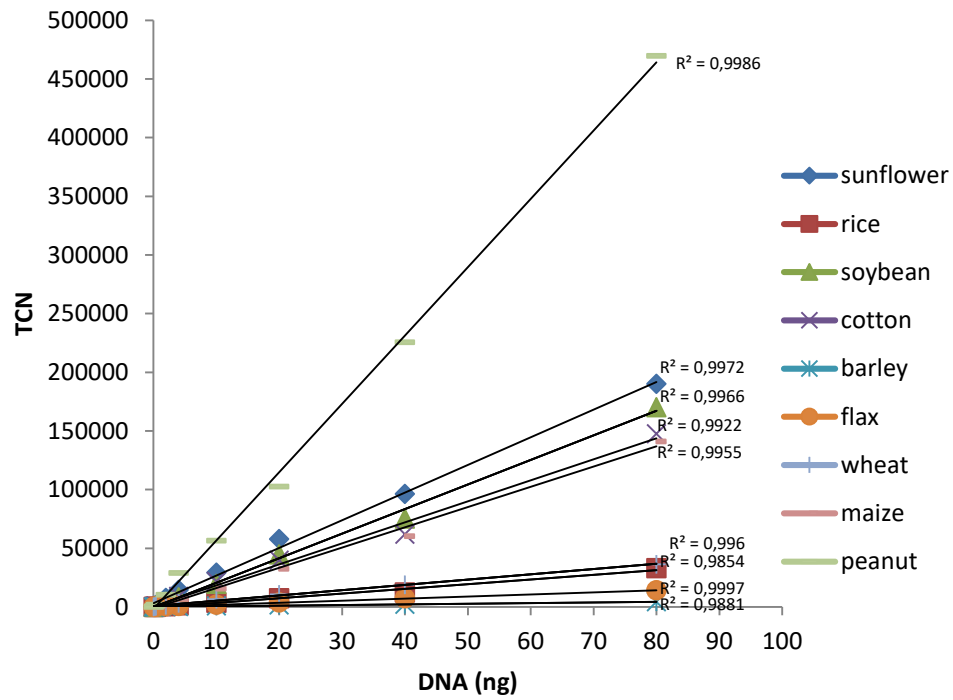

S3\_Fig
